# Supplementary material
Source: PubMed Central journal article supplement (PMC9263235)
Supplement: mmc1.pdf [file mmc1.pdf]

YMTHE, Volume 30

## Supplemental Information

**lncRNA *Neat1* regulates  
neuronal dysfunction post-sepsis via  
stabilization of hemoglobin subunit beta**

**Yan Wu, Pengfei Li, Liu Liu, Andrew J. Goodwin, Perry V. Halushka, Tetsuro Hirose, Shinichi Nakagawa, Jiliang Zhou, Meng Liu, and Hongkuan Fan**

## Supplemental figure

Figure S1

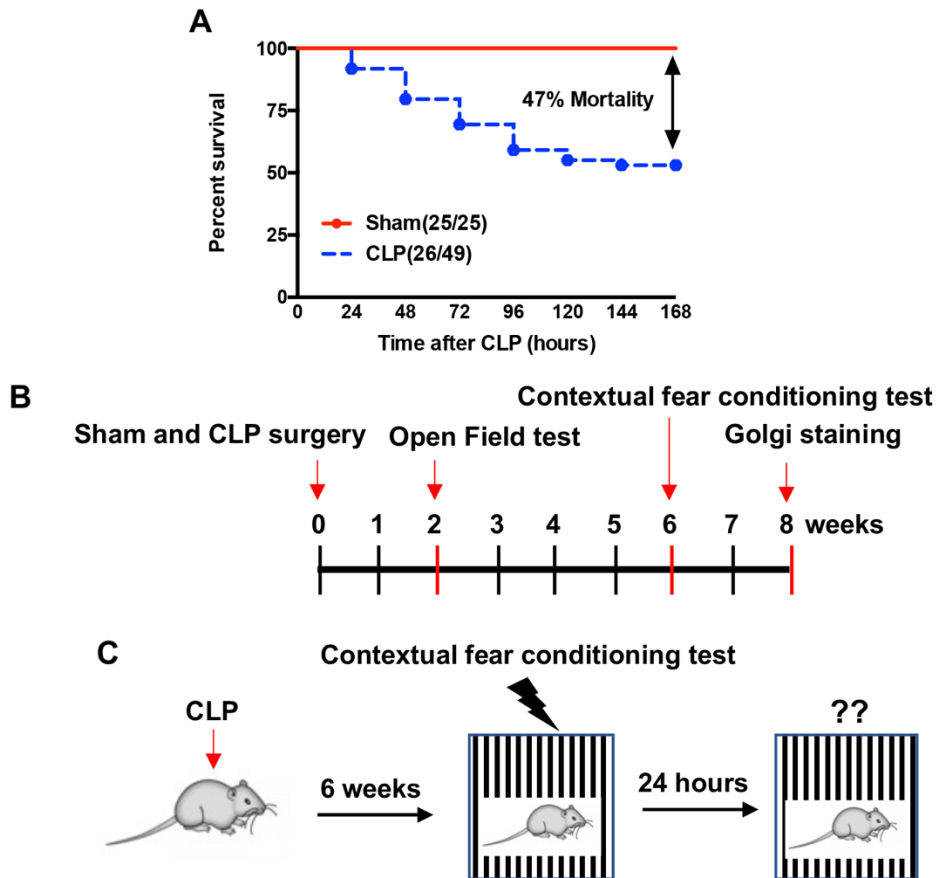

**Figure S1. The survival rate of CLP-induced sepsis model and timeline of the experimental design.**

(A) Cecal ligation and puncture (CLP)-induced sepsis resulted in 47% mortality over 7 days. (B) Diagram of the timeline for the experiments in this study. Mice were subjected to sham or CLP surgery. The open field (OF) test was performed at 2 weeks after CLP, and contextual fear conditioning (CFC) test was performed at 6 weeks after CLP. Mice were sacrificed at 8 weeks after CLP and dendritic spine density were determined. (C) Graphic depiction of CFC paradigm. Mice were subjected to a foot shock at 6 weeks after CLP and freezing behavior was monitored 24 hours after the foot shock.

Figure S2

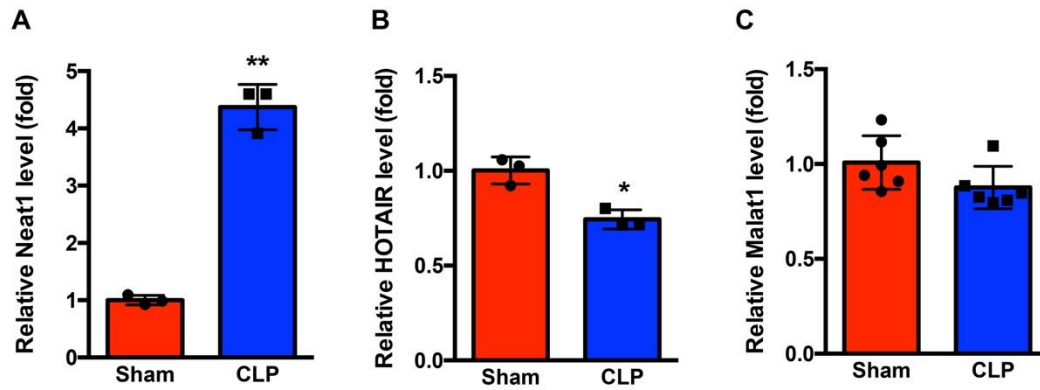

Figure S2. The LncRNA expression levels in mouse brain tissues after CLP.

The expression levels of *Neat1* (A), *HOTAIR* (B) and *Malat1* (C) in brain tissue were assessed 24h after sham or CLP (\*P < 0.05, \*\*P < 0.01, n = 3-6 mice/group)

Figure S3

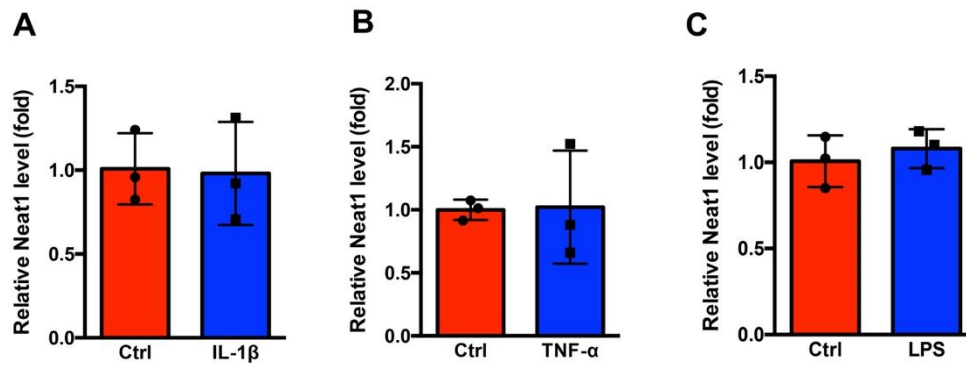

**Figure S3. Inflammatory cytokines IL-1 $\beta$ , TNF $\alpha$  or LPS do not induce *Neat1* expression in N2a cell.**

N2a cells were treated with IL-1 $\beta$  (40 ng/ml, A), TNF- $\alpha$  (20 ng/ml, B) or LPS (100 ng/ml, C) for 16h. *Neat1* expression levels were determined by RT-PCR (n = 3)

**Figure S4**

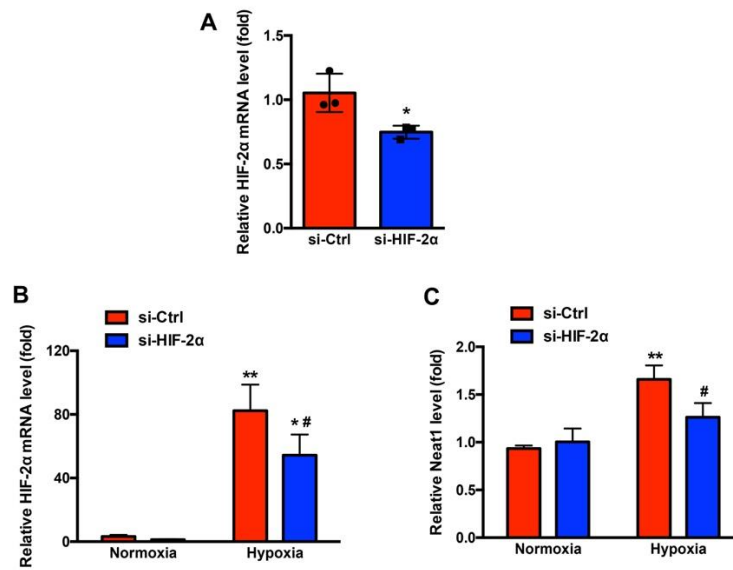

**Figure S4. Hypoxia induced increases of *Neat1* levels were mediated through HIF-2α dependent signaling pathway.**

(A) N2a cells were treated with siRNA against the HIF-2α and *HIF-2α* mRNA levels were analyzed by RT-PCR (\* $P < 0.05$ ,  $n = 3$ ). N2a cells were transfected with control or HIF-2α siRNA and expression levels of *HIF-2α* (B) and *Neat1* (C) in the normoxia and hypoxia condition were determined by RT-PCR (\* $P < 0.05$ , \*\* $P < 0.01$  compared with normoxia group, # $P < 0.05$  compared with si-Ctrl hypoxia group,  $n = 3$ ).

**Figure S5**

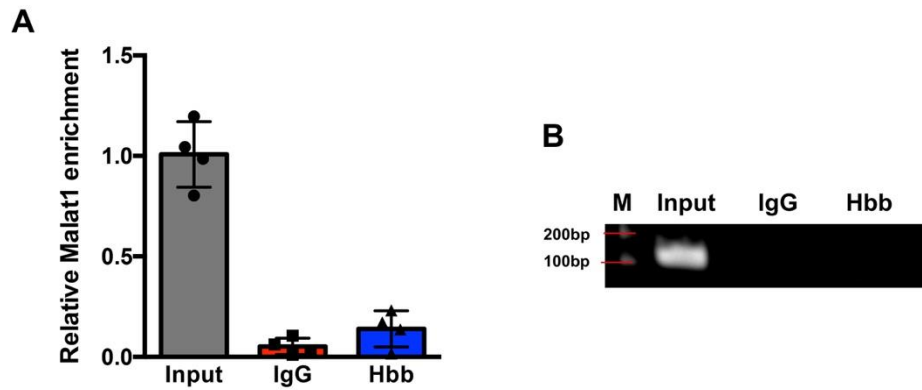

**Figure S5. Hbb protein was not associated with Malat1**

RNA immunoprecipitation (RIP) assays were performed in N2a cells. Protein-RNA complexes immunoprecipitated by anti-Hbb or control IgG were determined by qRT-PCR using primer for *Malat1* (A) and the qRT-PCR products were analyzed by electrophoresis (B) (M: marker).

**Figure S6**

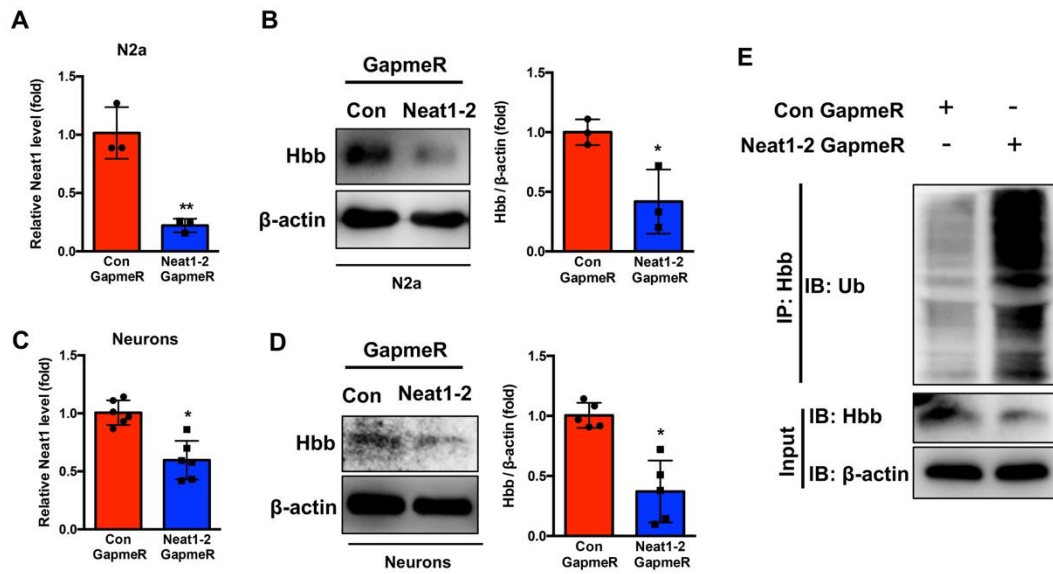

**Figure S6. Neat1 stabilizes Hbb via inhibiting Hbb ubiquitination.**

(A) The *Neat1* levels were measured in N2a cells transfected with Neat1 GapmeR #2 (\*\* $P < 0.01$ ,  $n = 3$ ). (B) The Hbb protein levels in N2a cells after transfection with *Neat1* GapmeR #2 (\* $P < 0.05$ ,  $n = 3$ ). (C) The *Neat1* levels were determined in primary neuronal cells transfected with *Neat1* GapmeR #2 for 24h (\* $P < 0.05$ ,  $n = 6$ ). (D) The Hbb protein levels in primary neuronal cells after transfection with *Neat1* GapmeR #2 for 24h (\* $P < 0.05$ ,  $n = 5$ ). (E) N2a cells transfected with control or *Neat1* GapmeR #2 were treated with MG-132 (5  $\mu$ M) for 16h. Cell lysates were immunoprecipitated with antibodies against Hbb or IgG. The levels of ubiquitination were analyzed by western blot. Lower panel, input from cell lysates. IB, immunoblot.

Figure S7

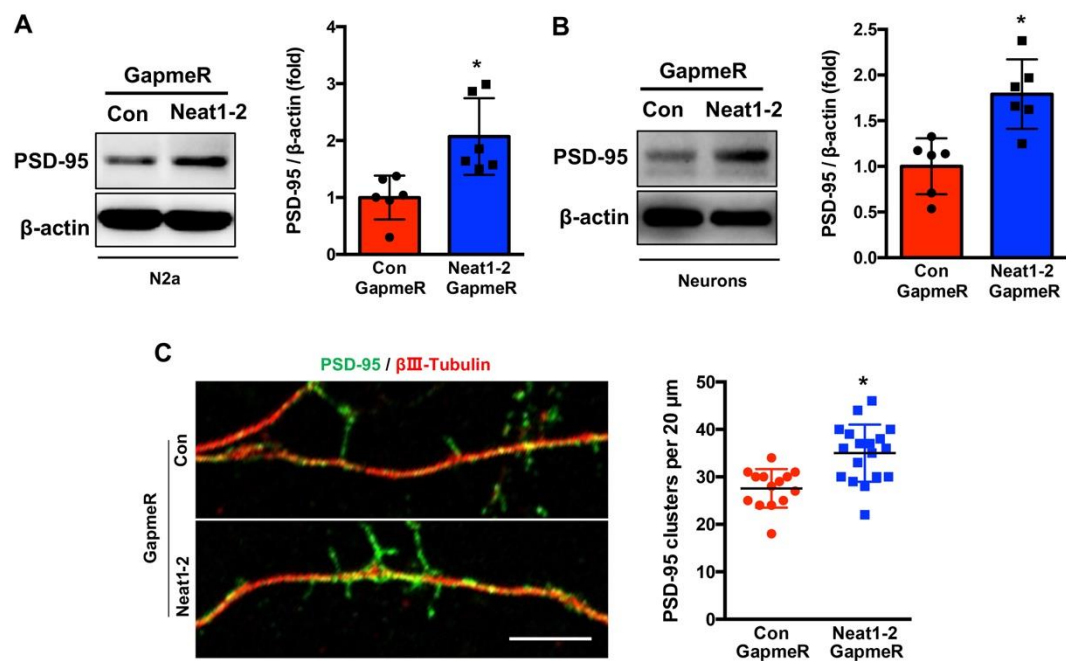

**Figure S7. Inhibition of Neat1 by GapmeR Neat1 #2 increases PSD-95 expression and dendritic spine density.**

(A) The PSD-95 protein levels were measured in N2a cells after transfection with *Neat1* GapmeR #2 for 48h (\*P < 0.05, n = 6). (B) The protein levels of PSD-95 were detected after transfection of the primary neuronal cells with *Neat1* GapmeR #2 for 24h (\*P < 0.05, n = 6). (C) Primary neurons were transfected with control or *Neat1* GapmeR #2 for 24h. The dendritic spine numbers were analyzed by immunostaining to label PSD-95 puncta and axons (\*P < 0.05, n = 6, PSD-95: green,  $\beta$ III-Tubulin: red, Scale bar = 5  $\mu$ m).



Figure S8

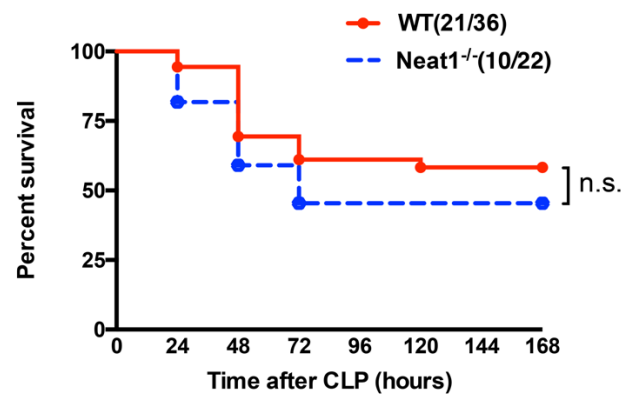

**Figure S8. The survival rate of CLP-induced sepsis model in wild-type and *Neat1*<sup>-/-</sup> mice**

Survival curves of WT and *Neat1*<sup>-/-</sup> mice after cecal ligation and puncture (CLP) over 168 hours. Mortality rate for WT mice was 42% and for *Neat1*<sup>-/-</sup> mice was 55%.

Figure S9

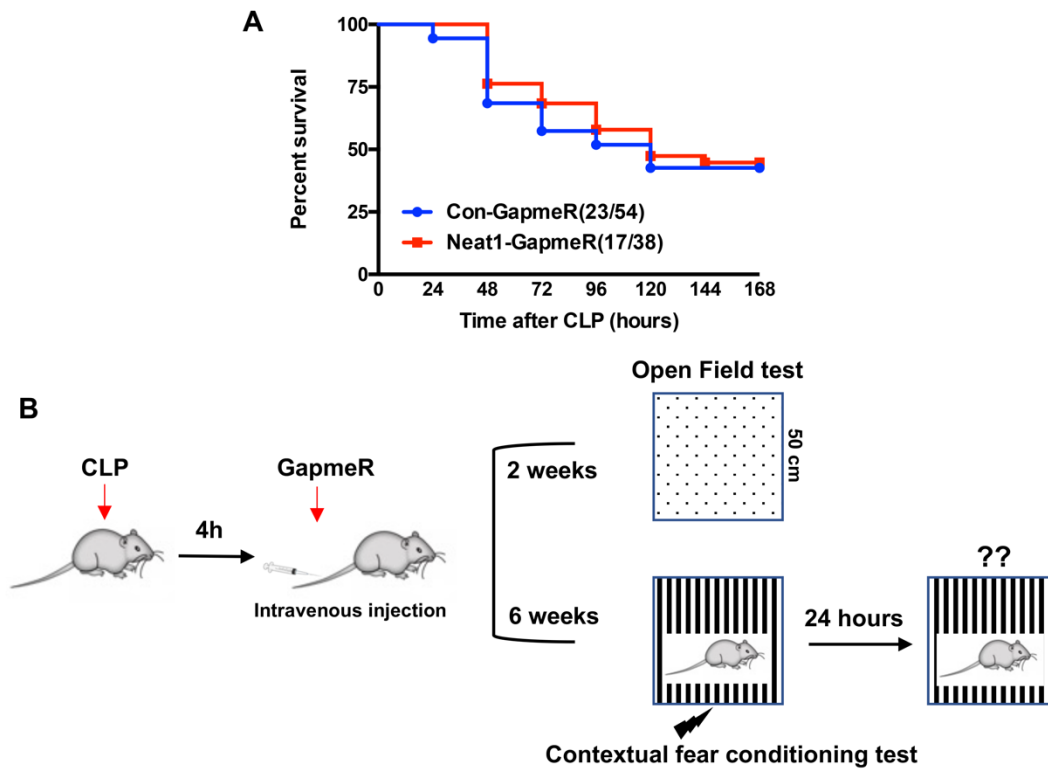

**Figure S9. The survival rate of CLP-induced septic mice treated with GapmeRs and the experimental design for behavior tests after *Neat1* GapmeR treatment.**

(A) Cecal ligation and puncture (CLP) sepsis resulted in 57% mortality after treatment with control GapmeR over 7 days, and CLP mice treatment with *Neat1* GapmeR resulted in 55% mortality. (B) Graphic depiction of open field test and single-pairing CFC paradigm in the GapmeR treated septic mice.

**Table. S1:** The details of proteins that bound to *Neat1* in lysed neuronal cells and their expression levels were altered 2-fold after CLP by LC-MS/MS analysis

| Protein IDs                                | Majority protein IDs | Protein names                                                                               | Gene names    | LFQ intensity CLP | LFQ intensity Sham | CLP-Sham   | Fold   |
|--------------------------------------------|----------------------|---------------------------------------------------------------------------------------------|---------------|-------------------|--------------------|------------|--------|
| P01942;P06467                              | P01942               | Hemoglobin subunit alpha                                                                    | Hba           | 32.82627106       | 30.12743378        | 2.69883728 | 6.4928 |
| P84244;P02301                              | P84244;P02301        | Histone H3.3;Histone H3.3C                                                                  | H3f3a;H3f3c   | 32.06814194       | 29.47618484        | 2.59195709 | 6.0292 |
| P08551                                     | P08551               | Neurofilament light polypeptide                                                             | Nefl          | 31.68420029       | 29.39054871        | 2.29365158 | 4.9030 |
| P02088;P02089;CON_Q3SX09;CON_P02070;P02104 | P02088;P02089        | Hemoglobin subunit beta-1;Hemoglobin subunit beta-2                                         | Hbb-b1;Hbb-b2 | 31.23020363       | 28.47119331        | 2.75901031 | 6.7693 |
| P08553                                     | P08553               | Neurofilament medium polypeptide                                                            | Nefm          | 31.1278019        | 29.23288155        | 1.89492035 | 3.7190 |
| P60202;P60202-2                            | P60202;P60202-2      | Myelin proteolipid protein                                                                  | Plp1          | 31.0664444        | 28.93438339        | 2.132061   | 4.3834 |
| P15864;Q07133                              | P15864               | Histone H1.2                                                                                | Hist1h1c      | 30.32345581       | 32.5653801         | -2.2419243 | 0.2114 |
| P19246                                     | P19246               | Neurofilament heavy polypeptide                                                             | Nefh          | 29.55605316       | 27.56347275        | 1.99258041 | 3.9795 |
| Q9Z2D6-2;Q9Z2D6                            | Q9Z2D6-2;Q9Z2D6      | Methyl-CpG-binding protein 2                                                                | Mecp2         | 29.26391792       | 30.37181473        | -1.1078968 | 0.4640 |
| P10922                                     | P10922               | Histone H1.0;Histone H1.0, N-terminally processed                                           | H1f0          | 29.03351784       | 31.00309753        | -1.9695797 | 0.2553 |
| P21844                                     | P21844               | Chymase                                                                                     | Cma1          | 28.78441048       | 27.57708359        | 1.20732689 | 2.3091 |
| Q9JHU4                                     | Q9JHU4               | Cytoplasmic dynein 1 heavy chain 1                                                          | Dync1h1       | 28.70833015       | 30.03826141        | -1.3299313 | 0.3978 |
| P16330-2;P16330                            | P16330-2;P16330      | 2,3-cyclic-nucleotide 3-phosphodiesterase                                                   | Cnp           | 28.70454216       | 26.92953873        | 1.77500343 | 3.4224 |
| P43274                                     | P43274               | Histone H1.4                                                                                | Hist1h1e      | 28.62505531       | 30.4685936         | -1.8435383 | 0.2786 |
| P0CW02;P0CW03                              | P0CW02;P0CW03        | Lymphocyte antigen 6C1;Lymphocyte antigen 6C2                                               | Ly6c1;Ly6c2   | 28.29535294       | 27.24780464        | 1.04754829 | 2.0670 |
| O54962                                     | O54962               | Barrier-to-autointegration factor;Barrier-to-autointegration factor, N-terminally processed | Banf1         | 27.51638031       | 25.75121117        | 1.76516914 | 3.3991 |
| P43277                                     | P43277               | Histone H1.3                                                                                | Hist1h1d      | 27.27746201       | 29.79197311        | -2.5145111 | 0.1750 |
| P63276                                     | P63276               | 40S ribosomal protein S17                                                                   | Rps17         | 26.50084686       | 27.81860542        | -1.3177586 | 0.4012 |
| Q02257                                     | Q02257               | Junction plakoglobin                                                                        | Jup           | 26.47374916       | 25.28665543        | 1.18709373 | 2.2769 |
| O08599;O08599-2                            | O08599;O08599-2      | Syntaxin-binding protein 1                                                                  | Stxbp1        | 26.42356682       | 27.54510117        | -1.1215343 | 0.4596 |
| Q9R069                                     | Q9R069               | Basal cell adhesion molecule                                                                | Bcam          | 26.11221313       | 24.4571991         | 1.65501404 | 3.1493 |
| P47955                                     | P47955               | 60S acidic ribosomal protein P1                                                             | Rplp1         | 25.9355526        | 27.59199333        | -1.6564407 | 0.3172 |
| P63085;Q63844                              | P63085               | Mitogen-activated protein kinase 1                                                          | Mapk1         | 25.71988869       | 26.82699203        | -1.1071033 | 0.4642 |
| P21619;P21619-2                            | P21619;P21619-2      | Lamin-B2                                                                                    | Lmnb2         | 25.57346153       | 28.06002617        | -2.4865646 | 0.1784 |
| P60229                                     | P60229               | Eukaryotic translation initiation factor 3 subunit E                                        | Eif3e         | 25.12986565       | 26.43552208        | -1.3056564 | 0.4045 |
| Q8CHT1-2;Q8CHT1                            | Q8CHT1-2;Q8CHT1      | Ephexin-1                                                                                   | Ngf           | 24.10876846       | 25.27255821        | -1.1637897 | 0.4463 |

**Table. S2:** Primers used for quantitative RT-qPCR (F: forward; R: reverse)

| Gene Name      | Species | Sequence (5' - 3')          |
|----------------|---------|-----------------------------|
| <i>c-fos</i>   | Mouse   | F: CGGGTTTCAACGCCGACTA      |
|                | Mouse   | R: TTGGCACTAGAGACGGACAGA    |
| <i>Egr1</i>    | Mouse   | F: TATACTGGCCGCTTCTCCCT     |
|                | Mouse   | R: AGAGGTCGGAGGATTGGTCA     |
| <i>Arc</i>     | Mouse   | F: AAGTGCCGAGCTGAGATGC      |
|                | Mouse   | R: CGACCTGTGCAACCCTTTC      |
| <i>Bdnf</i>    | Mouse   | F: TCATACTTCGGTTGCATGAAGG   |
|                | Mouse   | R: AGACCTCTCGAACCTGCCC      |
| <i>Homer1</i>  | Mouse   | F: CCCTCTCTCATGCTAGTTCAGC   |
|                | Mouse   | R: GCACAGCGTTTGCTTGACT      |
| <i>Nrn1</i>    | Mouse   | F: GCGGTGCAAATAGCTTACCTG    |
|                | Mouse   | R: CGGTCTTGATGTTTCGTCTTGTC  |
| <i>Hbb-b1</i>  | Mouse   | F: GCACCTGACTGATGCTGAGAA    |
|                | Mouse   | R: TTCATCGGCGTTCACCTTTC     |
| <i>Neat1</i>   | Mouse   | F: GCTCTGGGACCTTCGTGACTCT   |
|                | Mouse   | R: CTGCCTTGGCTTGGAAATGTAA   |
| GAPDH          | Mouse   | F: GGCAAATTCAACGGCACAGT     |
|                | Mouse   | R: GGGTCTCGCTCCTGGAAGAT     |
| <i>Malat1</i>  | Mouse   | F: GGGAGTGGTCTTAACAGGGAGGAG |
|                | Mouse   | R: GTGCCAACAGCATAGCAGTACACG |
| HOTAIR         | Mouse   | F: TCCAGATGGAAGGAACTCCAGACA |
|                | Mouse   | R: ATAGATGTGCGTGGTCAGATCGCT |
| PVT1           | Mouse   | F: CCTGGATGCCCACTGAAAAC     |
|                | Mouse   | R: GATAGACTGCTTGCCAGGGG     |
| HIF-2 $\alpha$ | Mouse   | F: CTGAGGAAGGAGAAATCCCGT    |
|                | Mouse   | R: TGTGTCCGAAGGAAGCTGATG    |
